# Supplementary material for: Research on the mechanism of P and F in phosphogypsum stabilized by humic acid synergized with group metallic triad-based curing agent
Source: Royal Society of Chemistry journal article supplement (doi:10.1039/d6ra01271j), 2026-04-14
Supplement: d6ra01271j1.pdf [file d6ra01271j1.pdf]

**Tab.S1 Leaching toxicity test of raw PG**

| Testing items  | Cd     | Pb     | Fe     | Mn   | Zn    | Cu     | Ni     |
|----------------|--------|--------|--------|------|-------|--------|--------|
| Content (mg/L) | 0.0035 | 0.0345 | 0.84   | 3.14 | 0.243 | 0.0145 | 0.0191 |
| Testing items  | As     | Hg     | Se     | Cr   | F     | P      | pH     |
| Content (mg/L) | 0.026  | ND     | 0.0059 | ND   | 23.3  | 47.7   | 3.62   |

**Note: ND indicates extremely low content, undetectable or below the lowest detectable limit of the instrument.**

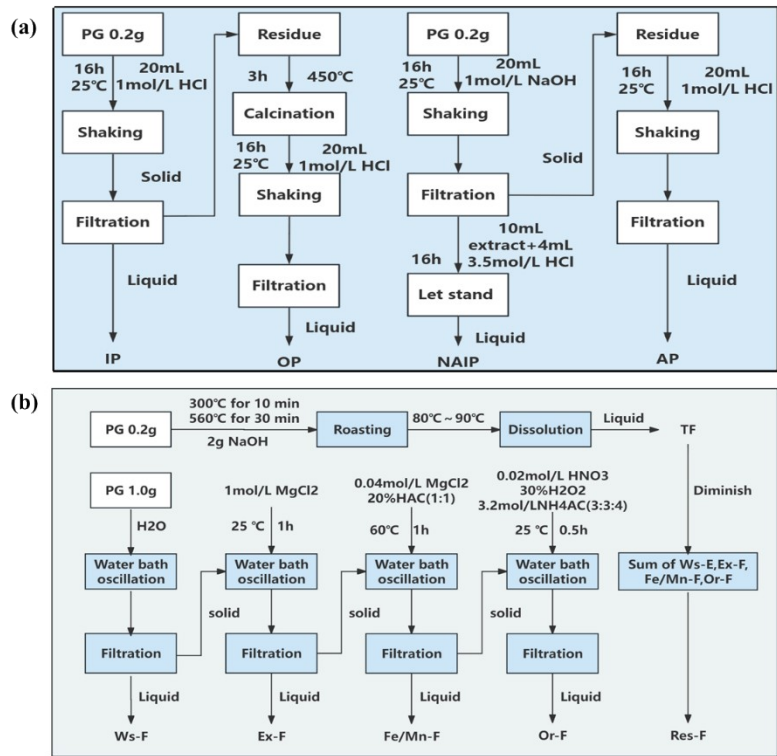

Fig.S1 Sequential extraction procedure for (a) phosphorus speciation analysis and (b) fluorine speciation analysis
